# Supplementary material
Source: PubMed Central journal article supplement (PMC4338509)
Supplement: NIHMS58217-supplement-Appendix_A2.pdf [file NIHMS58217-supplement-Appendix_A2.pdf]

**Anticipating the spatio-temporal response of plant diversity and vegetation structure to climate and land use change in a protected area**, Boulangeat, I., Georges, D., Dentant, C., Bonet, R., Van Es, J., Abdulhak, S., Zimmermann, N.E., Thuiller, W.

## **Appendix A2: Evolution of PFG range sizes and the average elevation of their distribution**

**Fig. A2a. Evolution of PFG range sizes.** All six repetitions are superimposed in the graphs. The solid lines correspond to scenarios without climate change and the dotted lines to scenarios accounting for climate change. **(a)** Same management as current. **(b)** Land use intensification management. **(c)** Land use abandonment scenario.

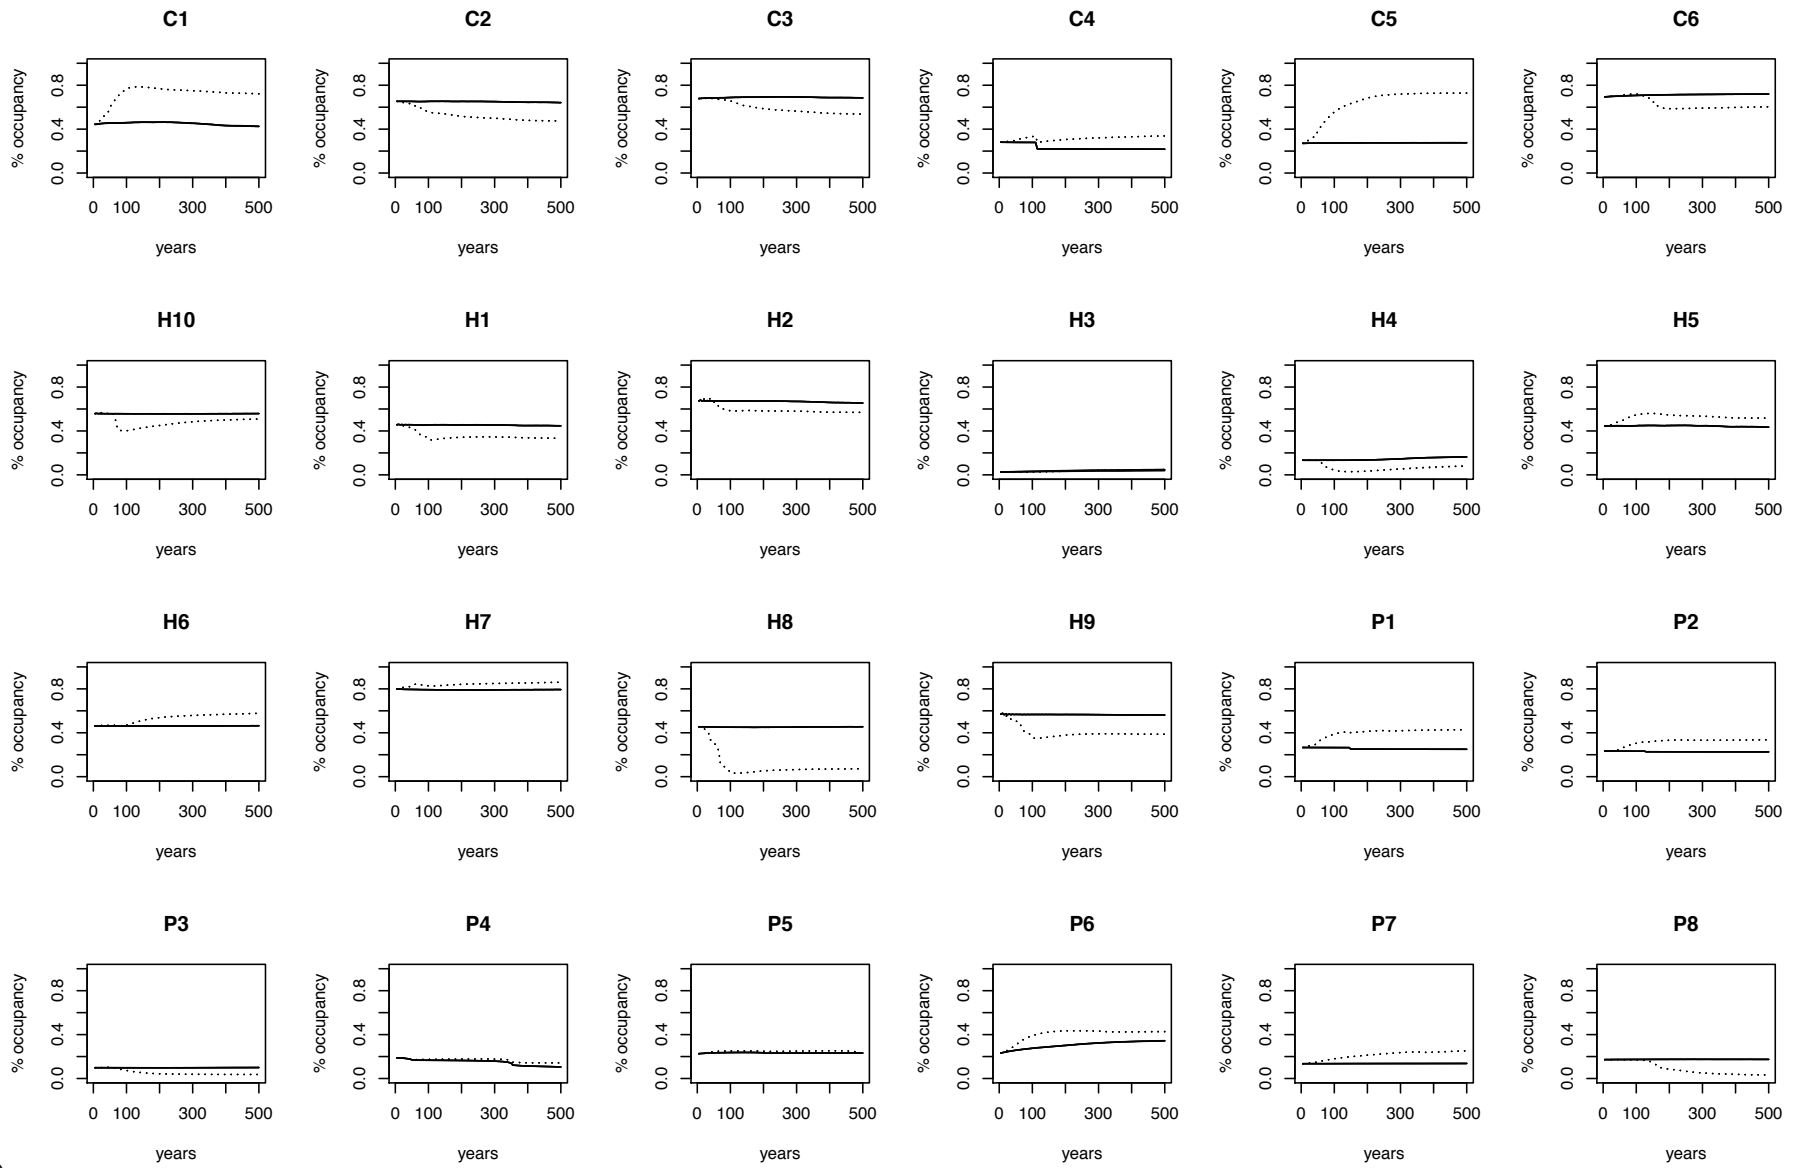

(a)

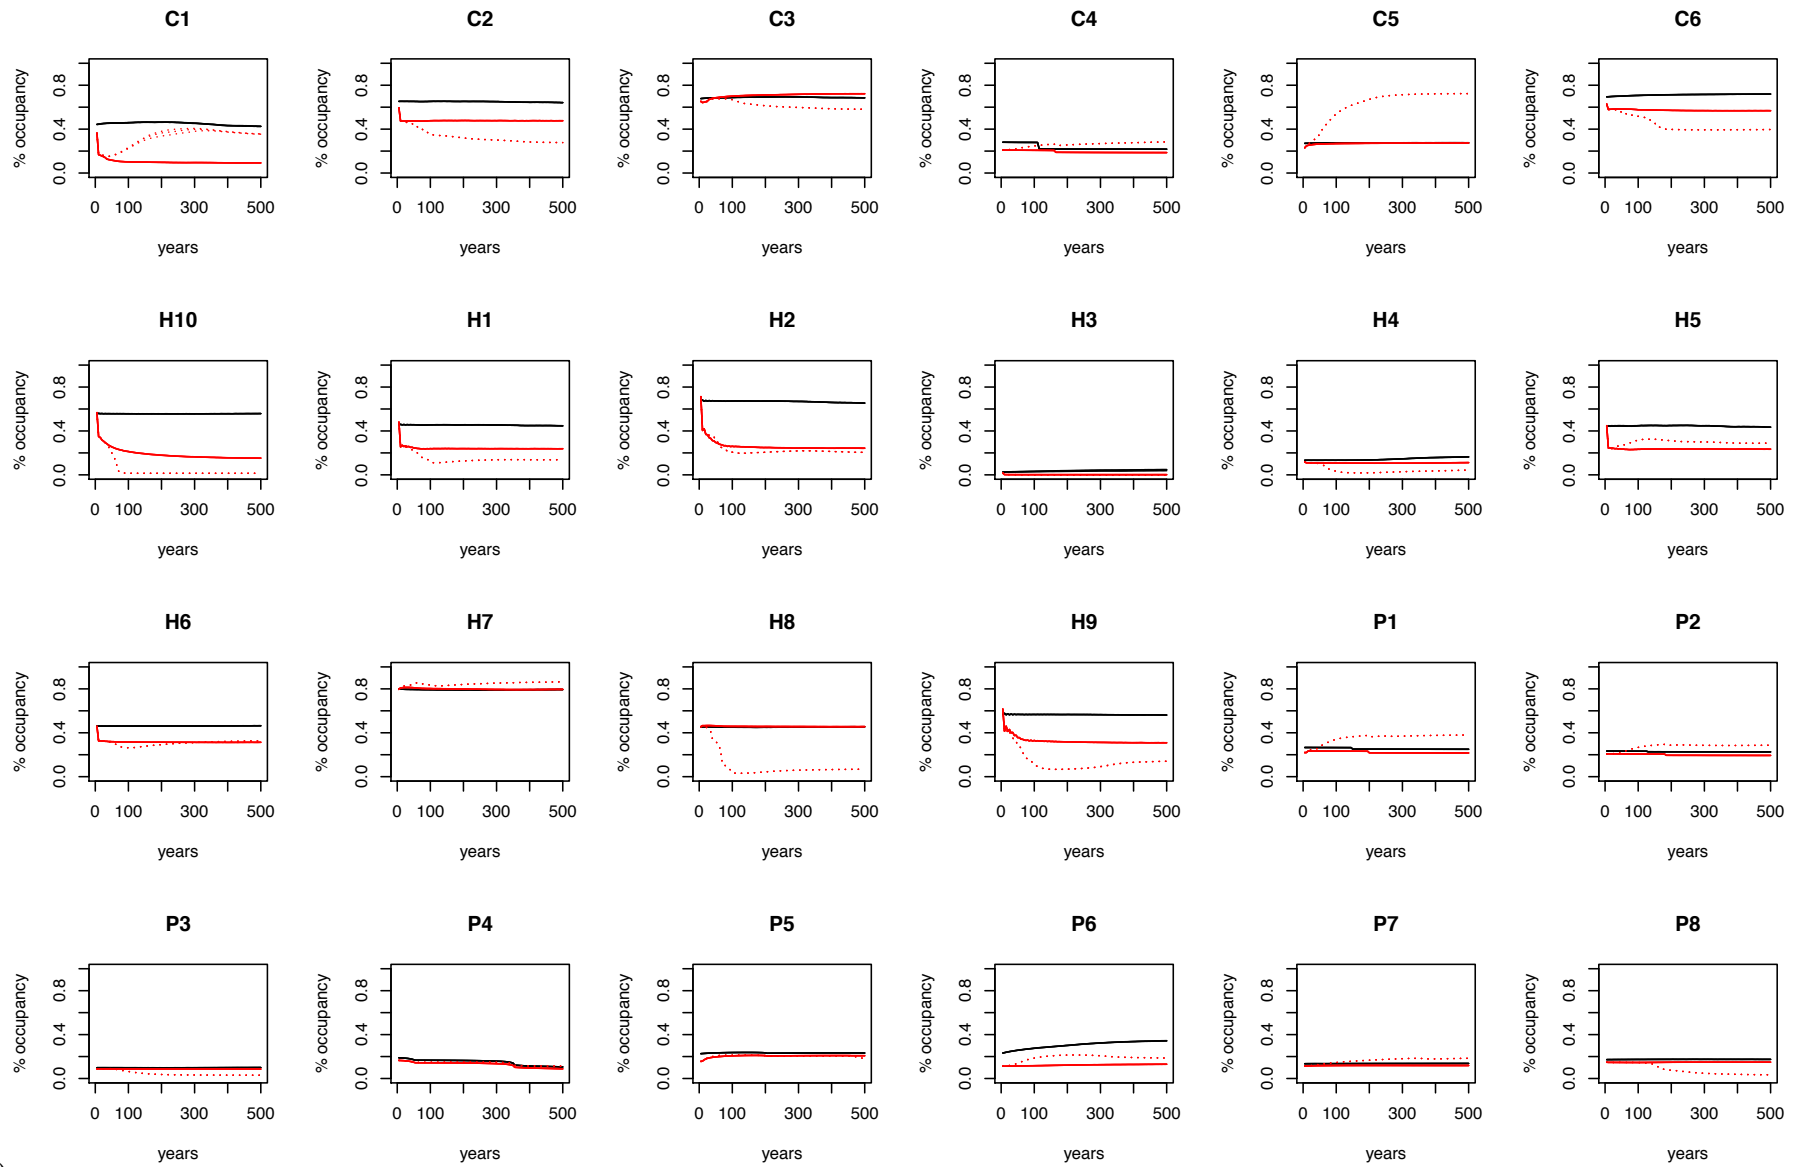

(b)

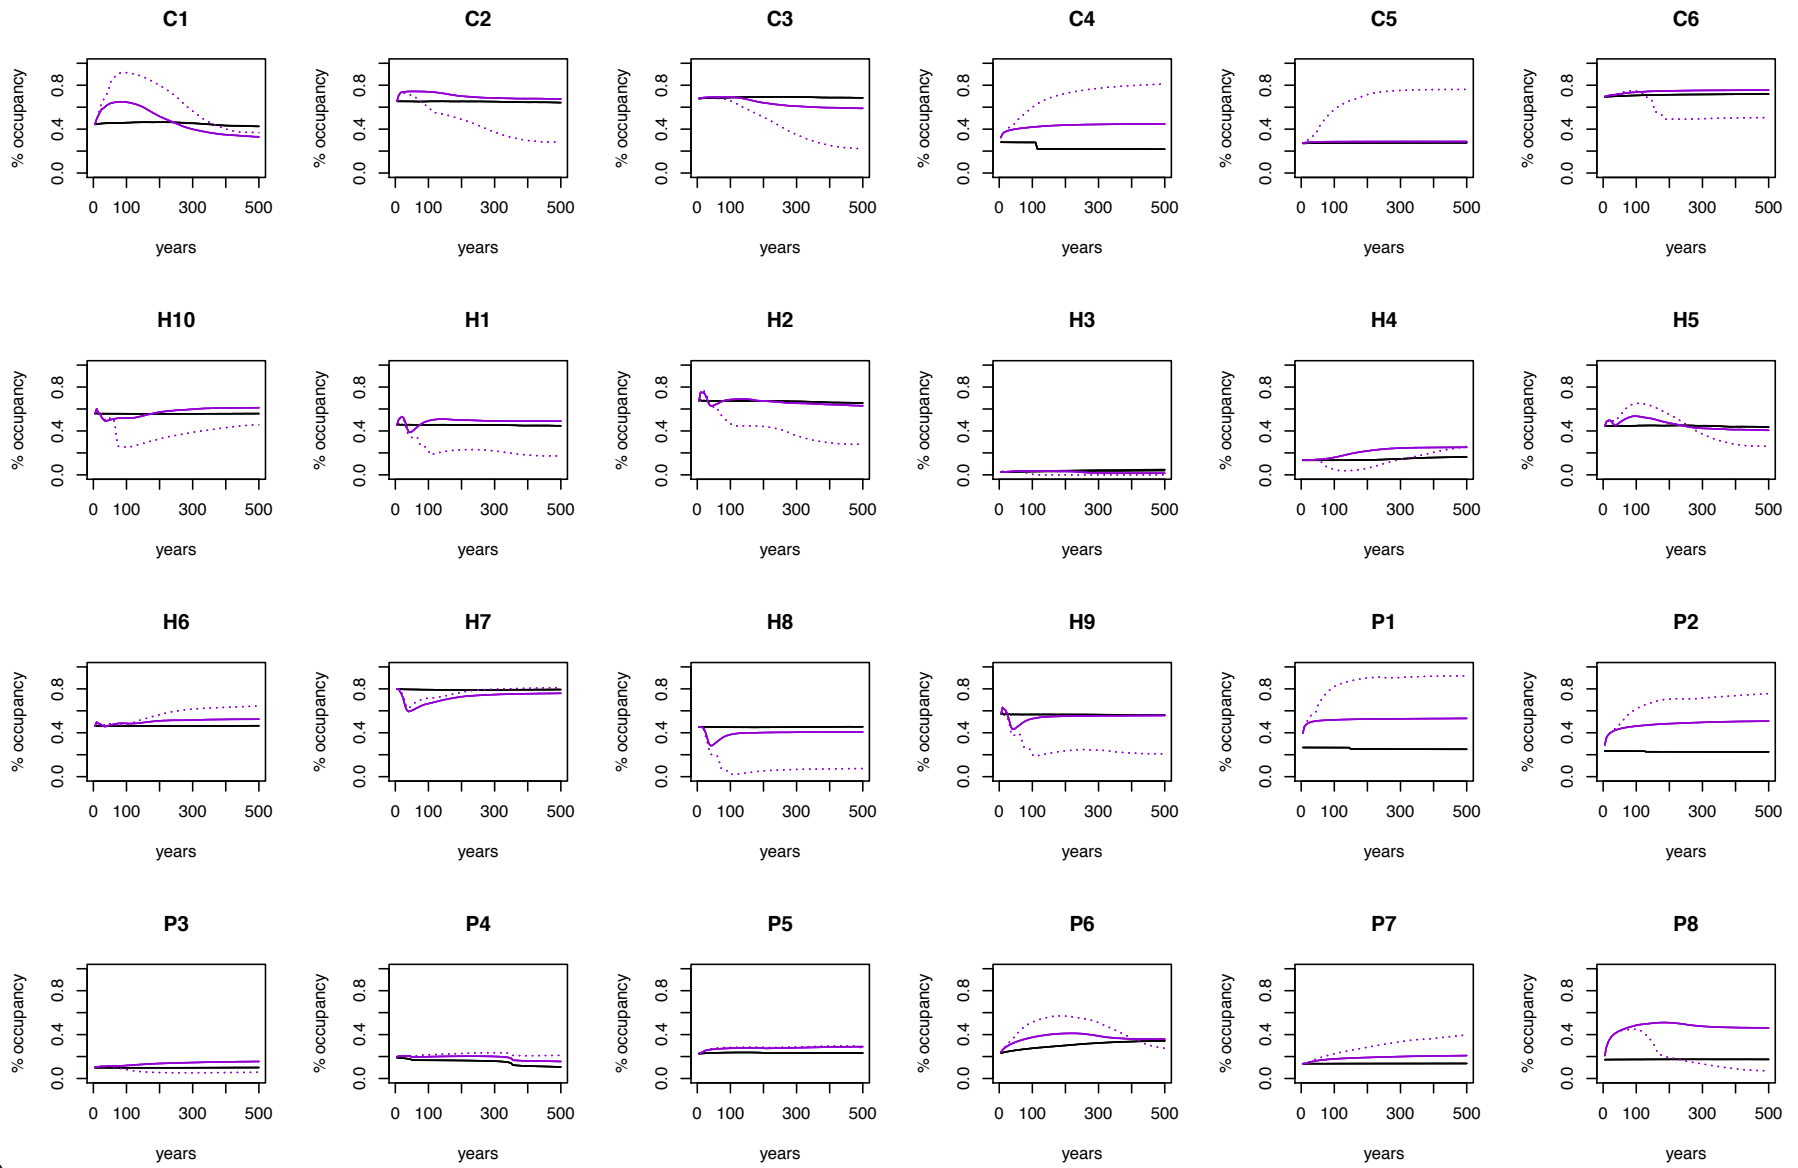

(c)

**Fig. A2b. Evolution of the average elevations of PFG distributions.** All six repetitions are superimposed in the graphs. The solid lines correspond to scenarios without climate change and the dotted lines to scenarios accounting for climate change. **(a)** Same management as current. **(b)** Land use intensification management. **(c)** Land use abandonment scenario.

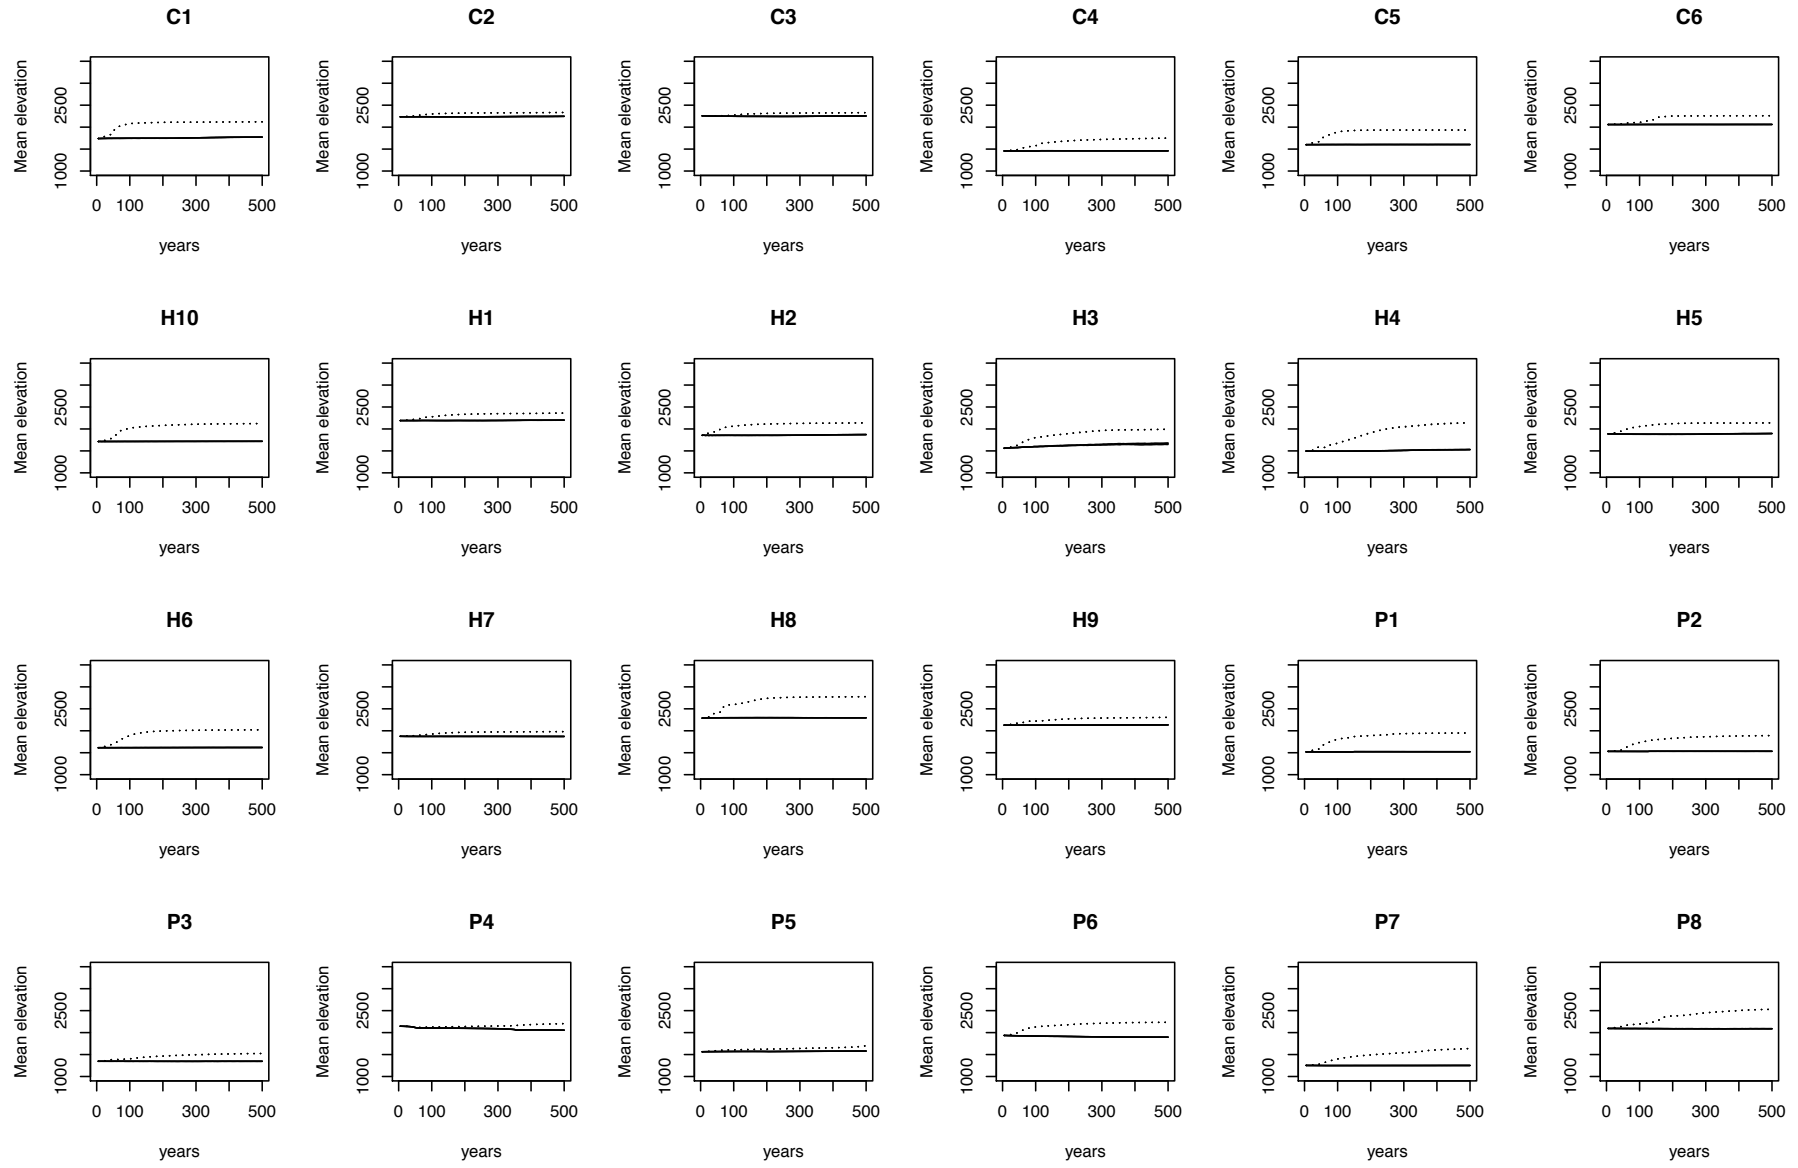

(a)

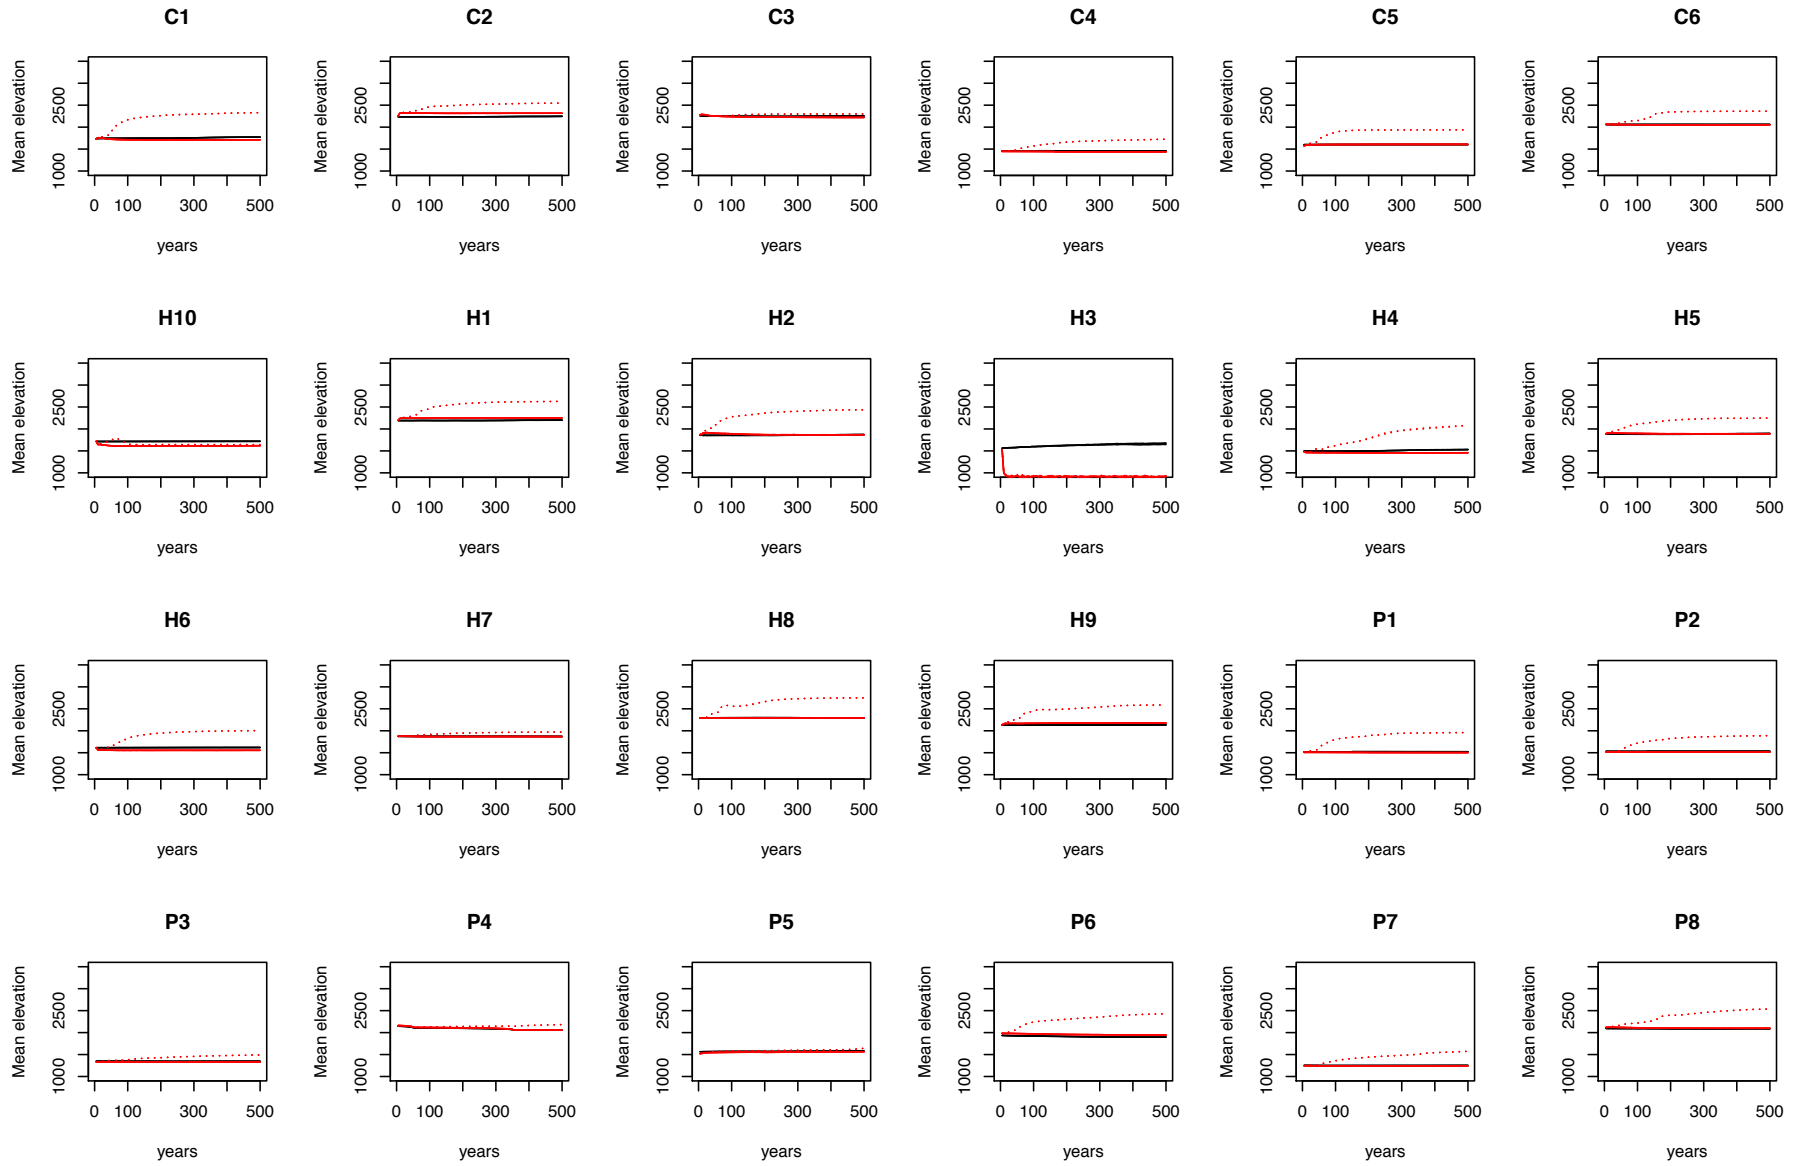

(b)

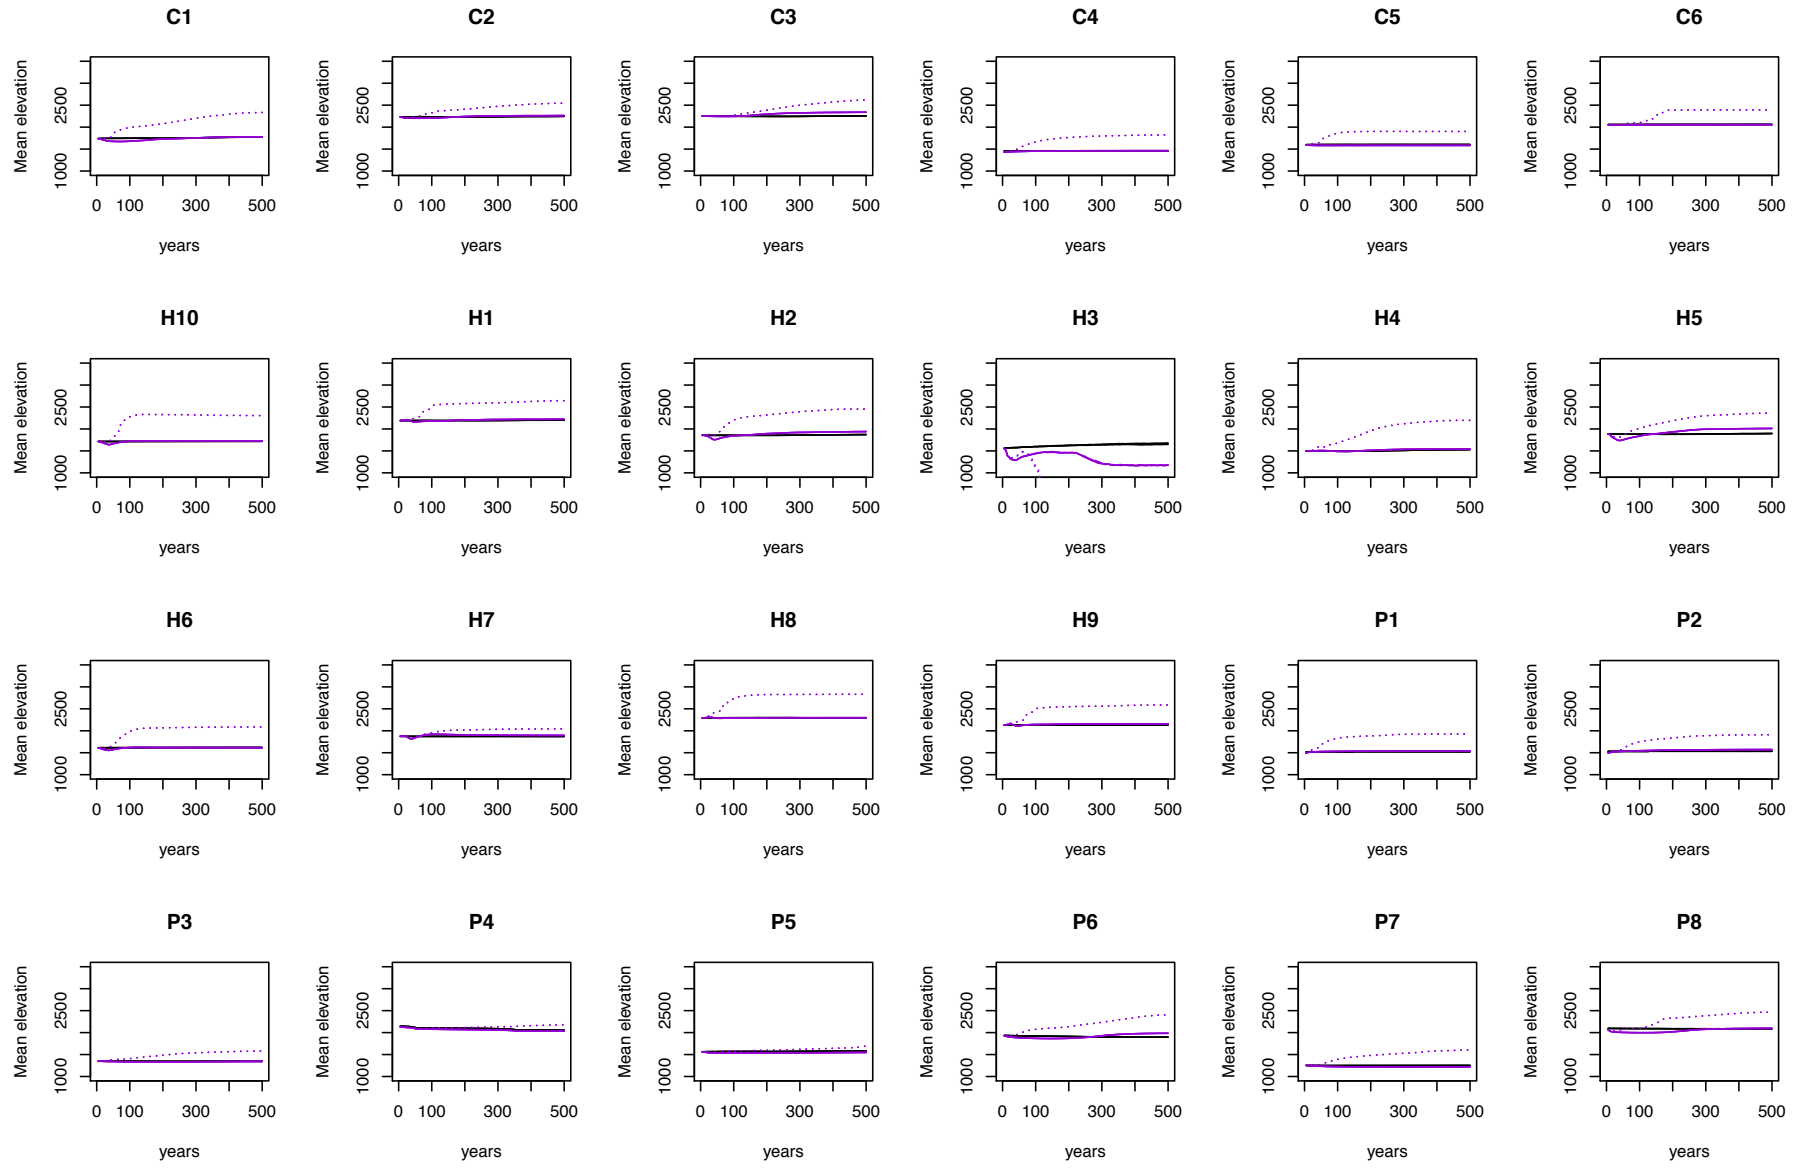

(c)
