# Supplementary material
Source: PubMed Central journal article supplement (PMC4338509)

**Anticipating the spatio-temporal response of plant diversity and vegetation structure to climate and land use change in a protected area**, Boulangeat, I., Georges, D., Dentant, C., Bonet, R., Van Es, J., Abdulhak, S., Zimmermann, N.E., Thuiller, W.

**Appendix A3: Better understanding the time-lag before observing the effect of climate change on vegetation**

Climate change effects on the vegetation are not immediate. In order to better understand which parameters are the most important in the “migration limitation”, we repeated the simulation with a regular seeding (addition of seeds of all PFGs everywhere in the landscape every five years).

**Fig. A3a Evolution of the tree cover through time and effect of the dispersal limitation.** For three chosen scenarios varying land use and accounting for climate change, we report the evolution of tree cover through time (black line) and compare it to simulations including a addition of seeds of all PFGs everywhere in the landscape every 5 years (red line).

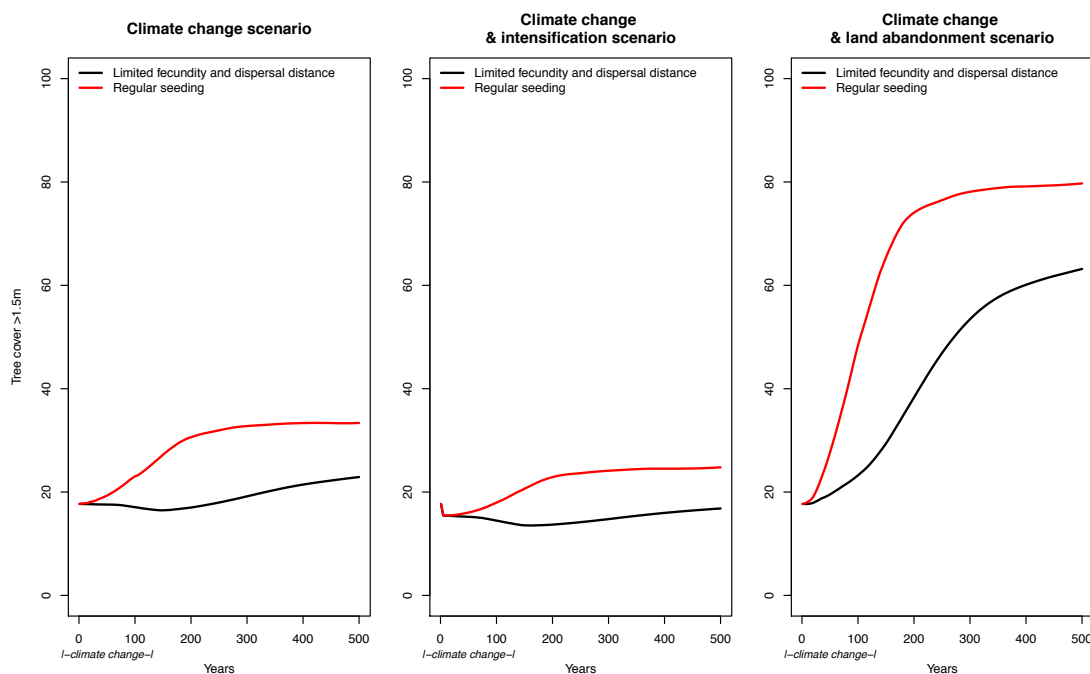

**Fig. A3b** Forest colonisation in the Fressinière valley under two contrasted management scenarios. The percentage of tree cover varies from 0 (yellow) to 100% (dark green). Pastures are shown at year zero in white. The red circle shows a high elevation zone that trees couldn't reach under the land use intensification scenario, as a consequence of the grazed pastures constituting a dispersal barrier.

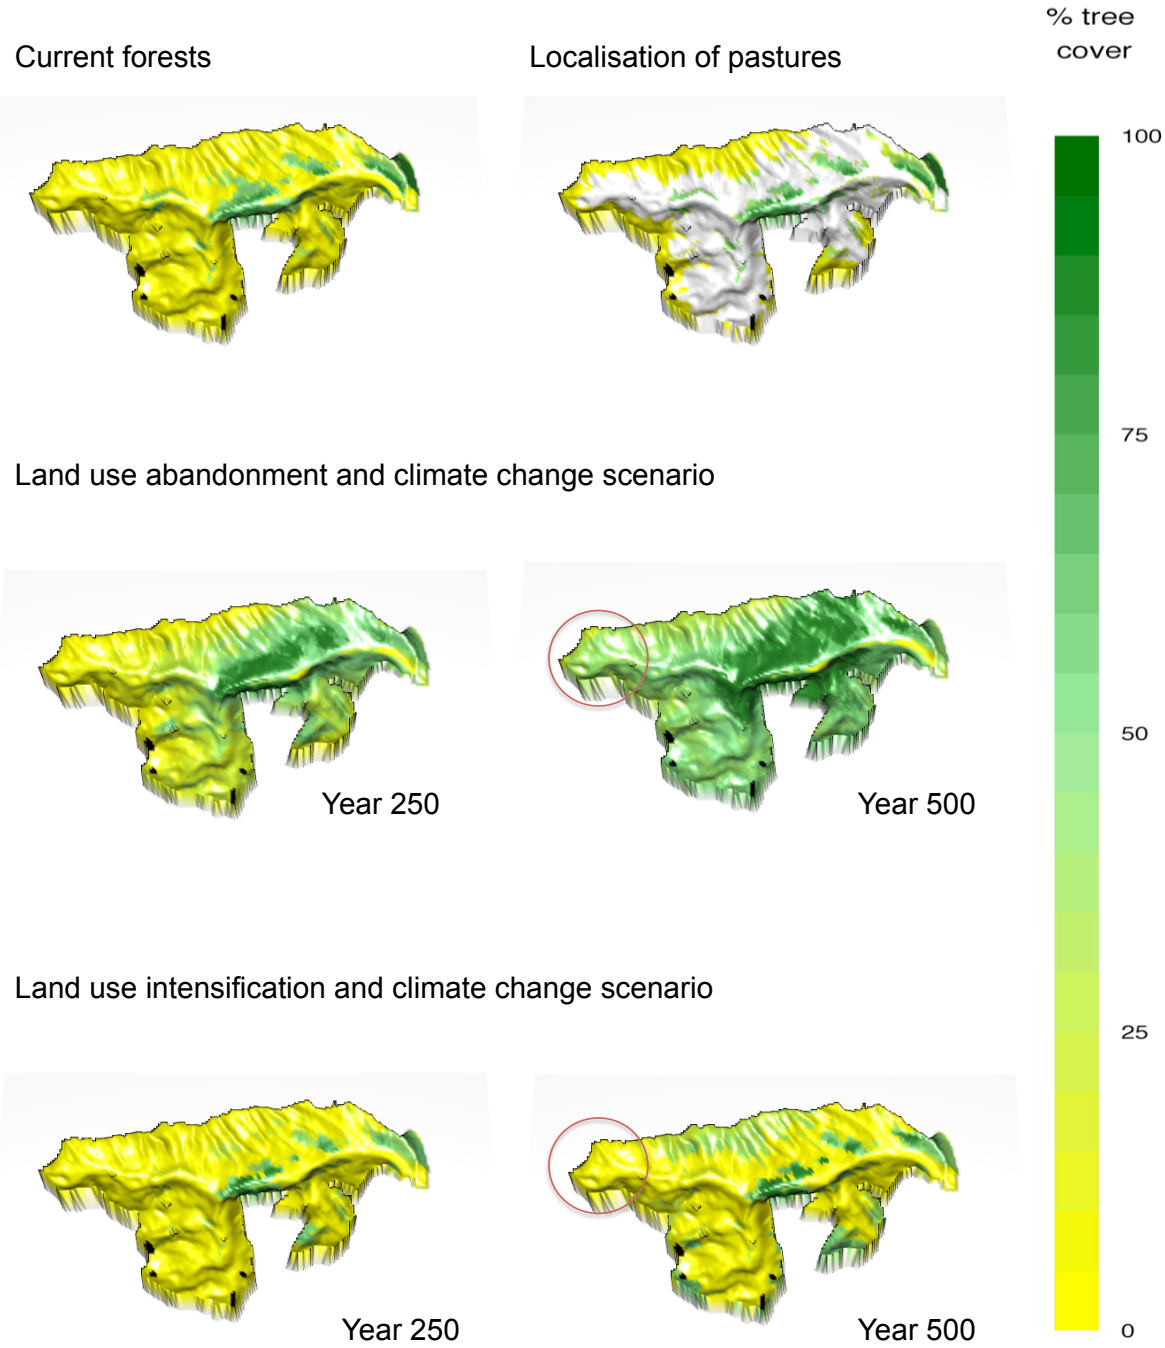

Supplement: NIHMS58217-supplement-Appendix_A3.pdf [file NIHMS58217-supplement-Appendix_A3.pdf]
